# Supplementary material for: Effects of cancer on patients with COVID-19: a systematic review and meta-analysis of 63,019 participants
Source: PubMed Central journal article supplement (PMC7877167; doi:10.20892/j.issn.2095-3941.2020.0559), 2021-02-15
Supplement: cbm-18-298-s001.pdf [file cbm-18-298-s001.pdf]

# Supplementary materials

**Table S1** Quality assessment of the included studies

| Author                                | Country  | Selection | Comparability | Outcome | Total |
|---------------------------------------|----------|-----------|---------------|---------|-------|
| Chinese CDC <sup>51</sup>             | China    | ***       | **            | ***     | ***** |
| Miyashita et al. <sup>52</sup>        | USA      | ****      | *             | **      | ***** |
| Goyal et al. <sup>53</sup>            | USA      | ****      | **            | **      | ***** |
| Baker et al. <sup>54</sup>            | UK       | ****      | **            | **      | ***** |
| Benelli et al. <sup>55</sup>          | Italy    | ****      | **            | ***     | ***** |
| Rossi et al. <sup>56</sup>            | Italy    | ****      | **            | **      | ***** |
| Nikpourghdam et al. <sup>57</sup>     | Iran     | ****      | **            | **      | ***** |
| Borobia et al. <sup>58</sup>          | Spain    | ****      | **            | ***     | ***** |
| Vasco et al. <sup>59</sup>            | Portugal | ****      | **            | ***     | ***** |
| Duanmu et al. <sup>60</sup>           | USA      | ****      | **            | ***     | ***** |
| Gold et al. <sup>61</sup>             | USA      | ***       | **            | ***     | ***** |
| Sami et al. <sup>62</sup>             | Iran     | ****      | **            | ***     | ***** |
| Regina et al. <sup>63</sup>           | Swiss    | ****      | **            | ***     | ***** |
| Ji et al. <sup>64</sup>               | Korea    | ****      | **            | ***     | ***** |
| Joharatnam-Hogan et al. <sup>65</sup> | UK       | ***       | *             | **      | ***** |
| Stroppa et al. <sup>66</sup>          | Italy    | **        | *             | ***     | ***** |
| Dai et al. <sup>41</sup>              | China    | ***       | **            | ***     | ***** |
| Mehta et al. <sup>67</sup>            | USA      | ****      | **            | **      | ***** |
| Yang et al. <sup>68</sup>             | China    | ***       | **            | **      | ***** |

The maximal score of NOS is 9 stars: 4 stars for the selection process, 2 stars for comparability and 3 stars for outcome, with 6 stars or more indicating high quality.

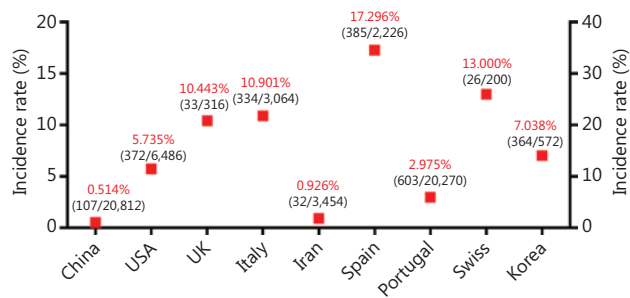

**Figure S1** Incidence of cancer in COVID-19 patients among different countries.

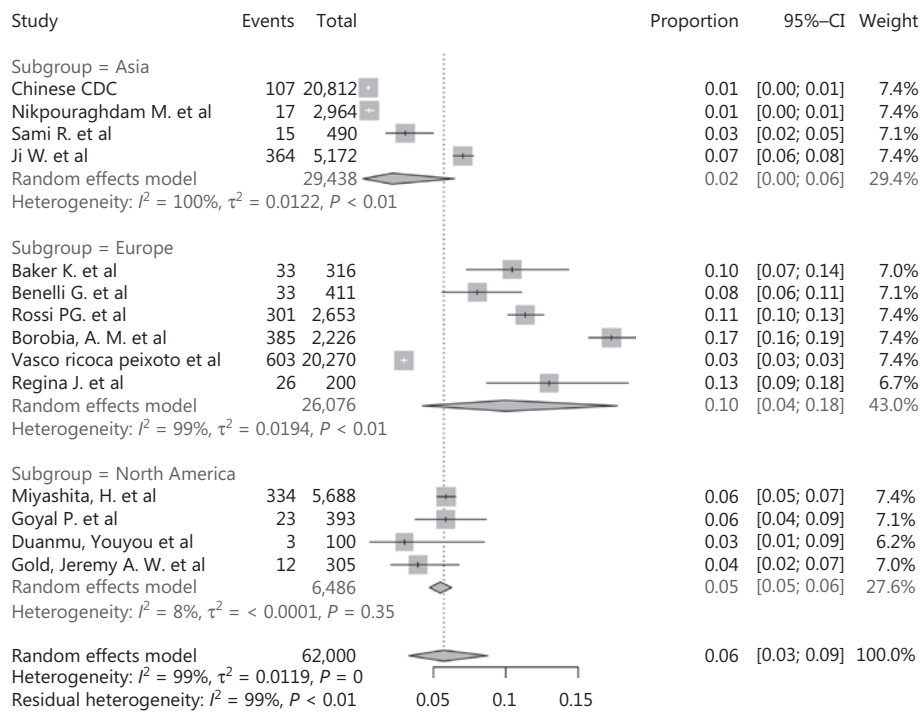

Figure S2 Forest plot for region subgroup analysis of the cancer incidence in COVID-19 patients.

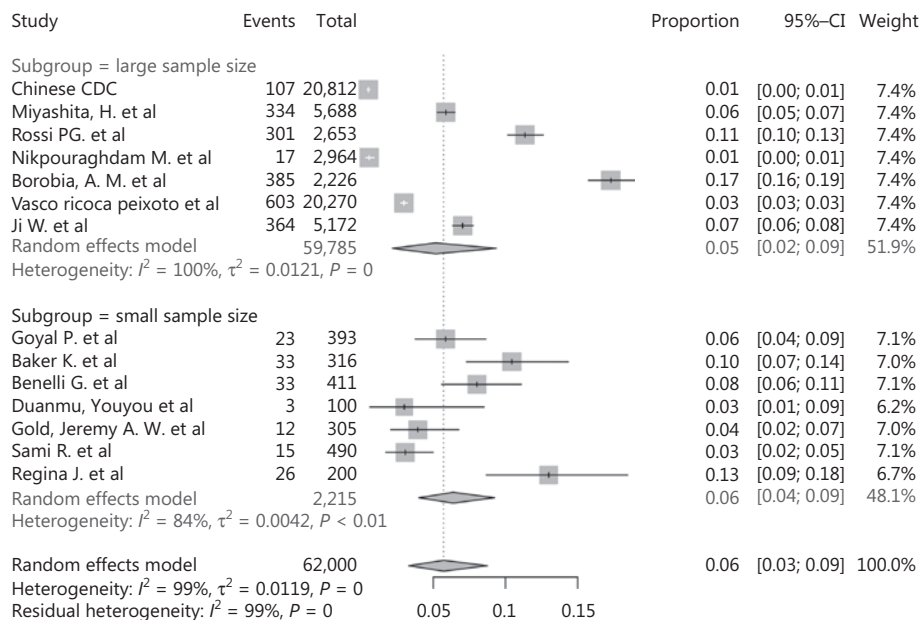

Figure S3 Forest plot for sample subgroup analysis of the cancer mortality in COVID-19 patients.

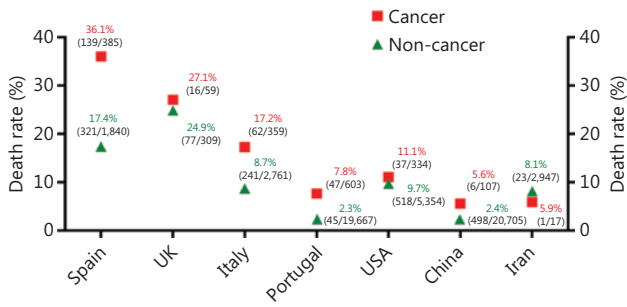

**Figure S4** Comparison of mortalities between cancer and noncancer patients among patients with COVID-19 in different countries.

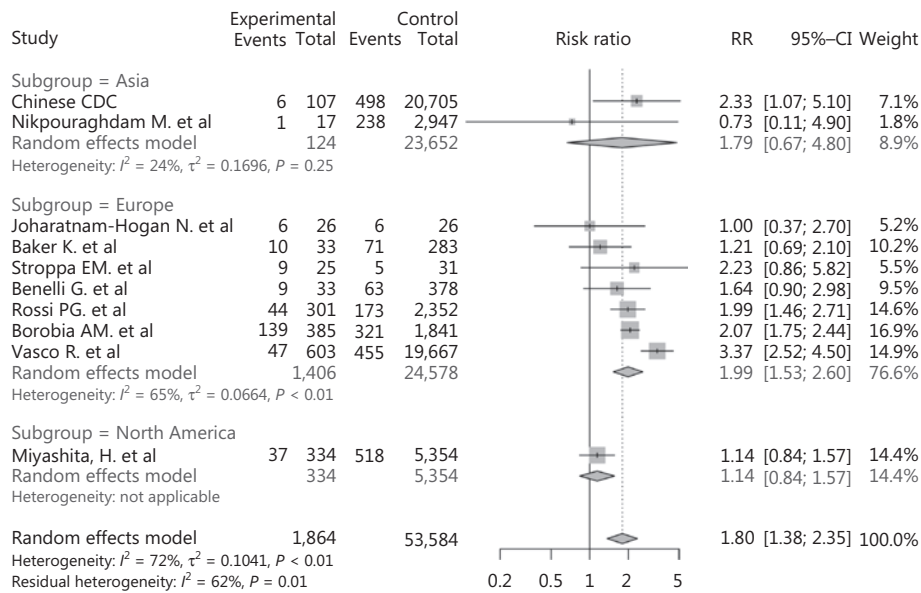

**Figure S5** Forest plot for region subgroup analysis of the cancer mortality in COVID-19 patients.

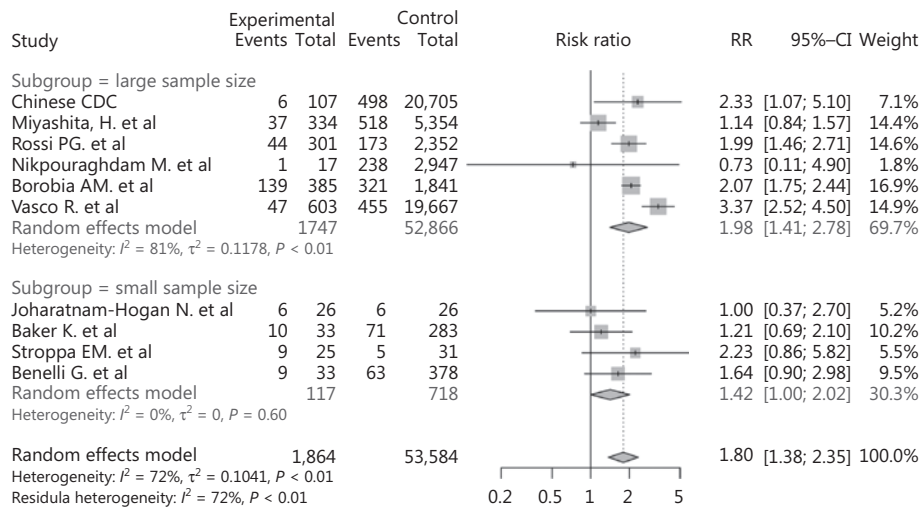

**Figure S6** Forest plot for sample size subgroup analysis of the cancer mortality in COVID-19 patients.

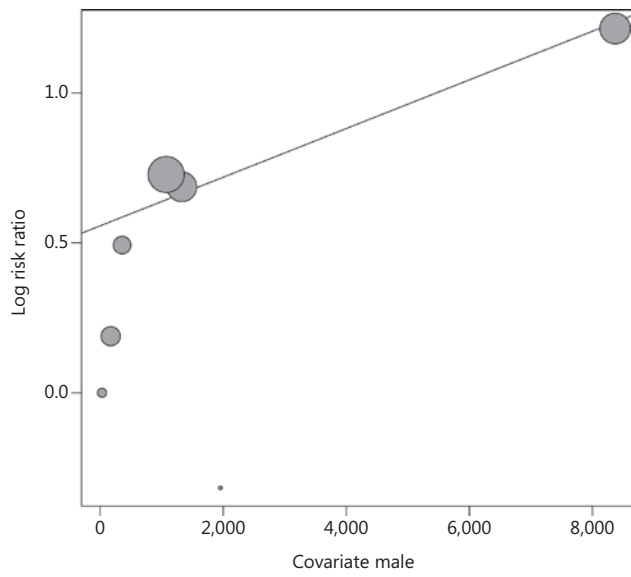

**Figure S7** Meta-regression between sex and cancer mortality in COVID-19 patients.

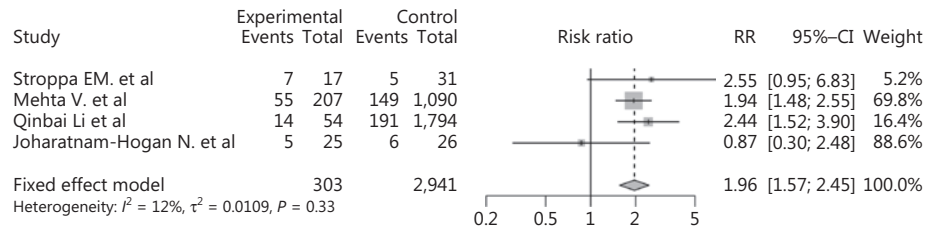

**Figure S8** Forest plot showing the mortality of non-lung cancer patients vs. non-cancer patients in the COVID-19 population.
